# Supplementary material for: First-principles study on the structural properties of 2D MXene SnSiGeN4and its electronic properties under the effects of strain and an external electric field
Source: Royal Society of Chemistry journal article supplement (doi:10.1039/d2ra05265b), 2022-01-01
Supplement: d2ra05265b1.pdf [file d2ra05265b1.pdf]

## Supporting information

### First-principles study on the structural properties of 2D MXene SnSiGeN<sub>4</sub> and its electronic properties under the effect of strain and external electric field

**Vo D. Dat<sup>1,2</sup>, Tuan V. Vu<sup>1,2</sup>, A.A. Lavrentyev<sup>3</sup>, O.Y. Khyzhun<sup>4</sup>, Nguyen N. Hieu<sup>5,6,†</sup>,  
and Hien D. Tong<sup>7,†</sup>**

<sup>1</sup>*Laboratory for Computational Physics, Institute for Computational Science and Artificial  
Intelligence, Van Lang University, Ho Chi Minh City, Vietnam.*

*E-mail: dat.vd@vlu.edu.vn*

<sup>2</sup>*Faculty of Mechanical - Electrical and Computer Engineering, Van Lang University, Ho  
Chi Minh City, Vietnam*

<sup>3</sup>*Department of Electrical Engineering and Electronics, Don State Technical University,  
1 Gagarin Square, 344010 Rostov-on-Don, Russian Federation*

<sup>4</sup>*Frantsevych Institute for Problems of Materials Science, National Academy of Sciences  
of Ukraine, 3 Krzhyzhanovsky Street, UA-03142 Kyiv, Ukraine*

<sup>5</sup>*Institute of Research and Development, Duy Tan University, Da Nang 550000, Vietnam.*

*Email: hieunn@duytan.edu.vn*

<sup>6</sup>*Faculty of Natural Sciences, Duy Tan University, Da Nang 550000, Vietnam*

<sup>7</sup>*Faculty of Engineering, Vietnamese-German University, Binh Duong, Vietnam.*

*E-mail: hien.td@vgu.edu.vn*

†To whom correspondence should be addressed.

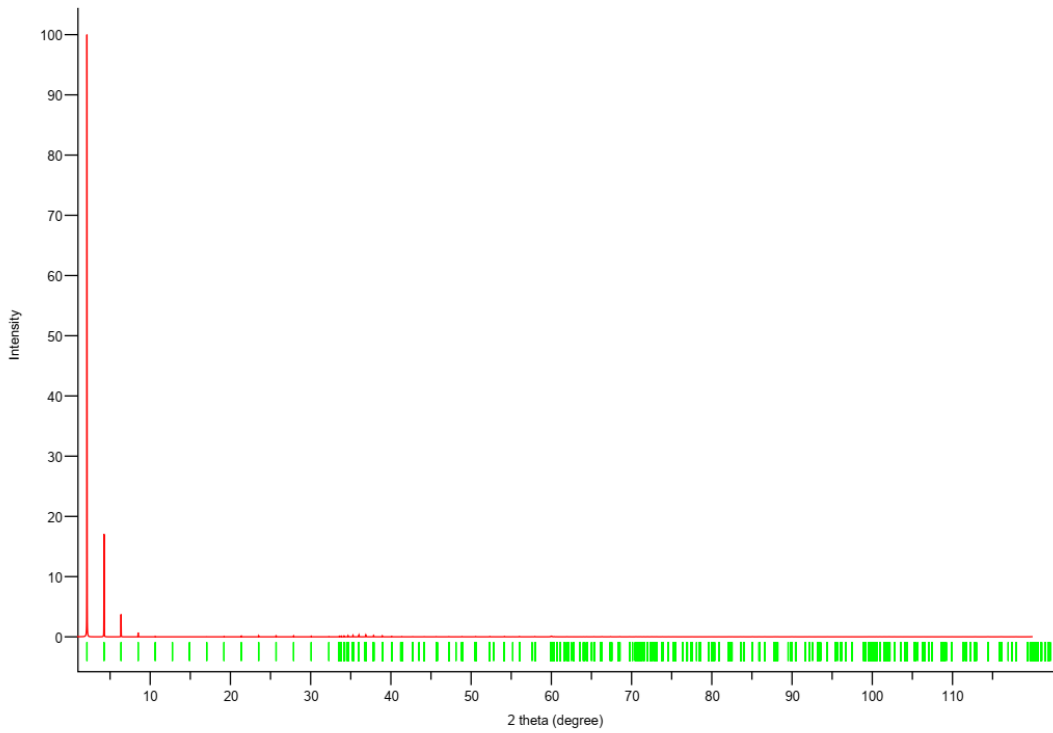

Figure S1. The theoretical X-ray diffraction pattern of layered SnSiGeN<sub>4</sub>.

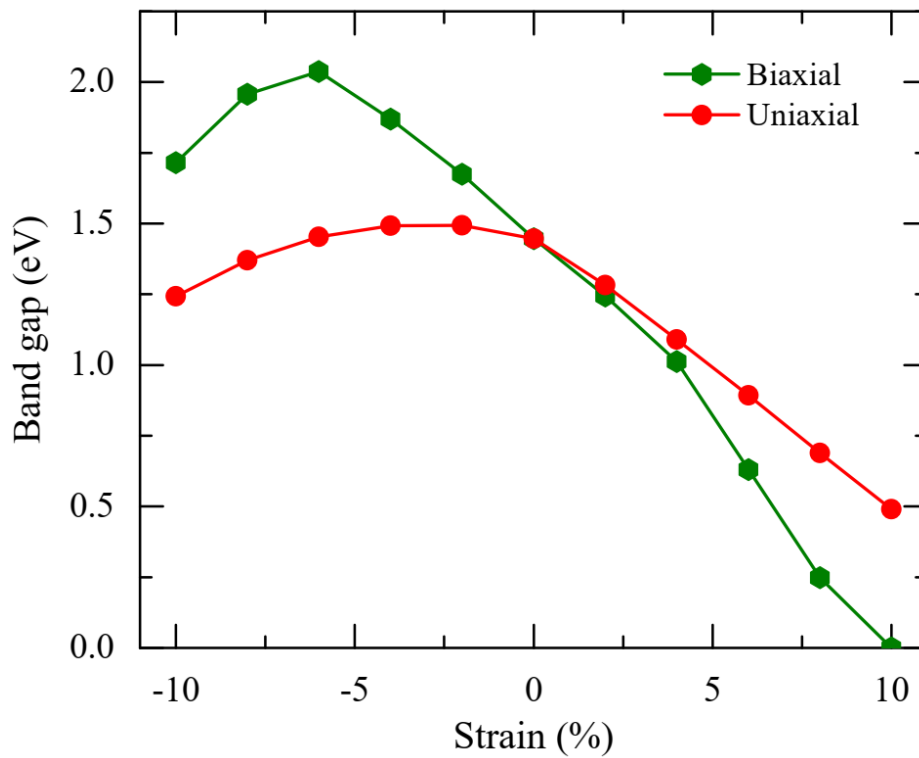

Figure S2. Band gap of SnSiGeN<sub>4</sub> monolayer as a function of biaxial and uniaxial strains.

Table S1. Calculated Bader charges of Si, Sn, Ge, and N atoms of SnSiGeN<sub>4</sub> under biaxial strains. The minus sign indicates electron loss from the neutral atom.

| Atom | -10 %  | -8%    | -6%    | -4%    | -2%    | 0%     | 2%     | 4%     | 6%     | 8%     | 10%    |
|------|--------|--------|--------|--------|--------|--------|--------|--------|--------|--------|--------|
| Si   | -2.356 | -2.158 | -2.132 | -2.108 | -2.083 | -1.936 | -1.917 | -1.889 | -1.914 | -1.931 | -3.952 |
| Sn   | -2.030 | -2.035 | -1.995 | -1.959 | -1.930 | -1.900 | -1.867 | -1.827 | -1.785 | -1.750 | -1.843 |
| Ge   | -1.581 | -1.644 | -1.629 | -1.626 | -1.595 | -1.577 | -1.549 | -1.552 | -1.532 | -1.502 | -1.755 |
| N1   | 1.409  | 1.440  | 1.408  | 1.382  | 1.364  | 1.341  | 1.316  | 1.288  | 1.268  | 1.244  | 1.370  |
| N2   | 1.193  | 1.214  | 1.205  | 1.209  | 1.181  | 1.167  | 1.143  | 1.155  | 1.133  | 1.109  | 1.297  |
| N3   | 1.825  | 1.567  | 1.542  | 1.521  | 1.494  | 1.343  | 1.327  | 1.297  | 1.321  | 1.332  | 2.879  |
| N4   | 1.540  | 1.616  | 1.601  | 1.582  | 1.569  | 1.561  | 1.546  | 1.529  | 1.509  | 1.499  | 2.003  |

Table S2. Calculated Bader charges of Si, Sn, Ge, and N atoms of SnSiGeN<sub>4</sub> under uniaxial strains. The minus sign indicates electron loss from the neutral atom.

| Atom | -10 %  | -8%    | -6%    | -4%    | -2%    | 0%     | 2%     | 4%     | 6%     | 8%     | 10%    |
|------|--------|--------|--------|--------|--------|--------|--------|--------|--------|--------|--------|
| Si   | -2.097 | -2.029 | -2.023 | -2.023 | -2.003 | -1.936 | -1.974 | -1.984 | -1.973 | -1.985 | -2.366 |
| Sn   | -2.011 | -1.945 | -1.946 | -1.930 | -1.914 | -1.900 | -1.879 | -1.869 | -1.853 | -1.828 | -1.820 |
| Ge   | -1.643 | -1.595 | -1.618 | -1.598 | -1.591 | -1.577 | -1.581 | -1.557 | -1.538 | -1.531 | -1.622 |
| N1   | 1.412  | 1.383  | 1.372  | 1.360  | 1.350  | 1.341  | 1.329  | 1.320  | 1.307  | 1.295  | 1.272  |
| N2   | 1.228  | 1.173  | 1.204  | 1.186  | 1.180  | 1.167  | 1.174  | 1.151  | 1.137  | 1.131  | 1.241  |
| N3   | 1.456  | 1.435  | 1.432  | 1.430  | 1.409  | 1.343  | 1.383  | 1.395  | 1.384  | 1.401  | 1.699  |
| N4   | 1.653  | 1.579  | 1.580  | 1.575  | 1.570  | 1.561  | 1.547  | 1.545  | 1.536  | 1.517  | 1.596  |
